# Supplementary material
Source: PubMed Central journal article supplement (PMC8506599)
Supplement: pt1c00142_si_001.pdf [file pt1c00142_si_001.pdf]

## Supporting Information

Blood-placental barrier transfers and pharmacokinetics of unbound morphine in pregnant rats with multiple microdialysis systems

I-Hsin Lin<sup>1</sup>, Ling Yang<sup>1</sup>, Thomas Y. Hsueh<sup>2,3</sup>, and Tung-Hu Tsai<sup>1,4,5\*</sup>

<sup>1</sup> Institute of Traditional Medicine, School of Medicine, National Yang Ming Chiao Tung University, Taipei, Taiwan

<sup>2</sup> Division of Urology, Department of Surgery, Taipei City Hospital Renai Branch, Taipei, Taiwan

<sup>3</sup> Department of Urology, School of Medicine, National Yang Ming Chiao Tung University, Taipei, Taiwan

<sup>4</sup> Graduate Institute of Acupuncture Science, China Medical University, Taichung, Taiwan

<sup>5</sup> Department of Psychology, University of Cambridge, Cambridge CB2 3EB, UK

-----  
\*Author for correspondence:

Tung-Hu Tsai, PhD, Professor

Institute of Traditional Medicine, School of Medicine, National Yang Ming Chiao Tung University, 155, Li-Nong Street Section 2, Taipei 112, Taiwan

Fax: (886-2) 2822 5044; Tel: (886-2) 2826 7115; E-mail: thtsai@nycu.edu.tw

### Table of Contents

|                                                                                                                                   |     |
|-----------------------------------------------------------------------------------------------------------------------------------|-----|
| ● <b>Table S1.</b> Precision and accuracy of the UHPLC-MS/MS method of morphine.....                                              | S2  |
| ● <b>Table S2.</b> Precision and accuracy of the UHPLC-MS/MS method of M3G.....                                                   | S3  |
| ● <b>Table S3.</b> Precision and accuracy of the UHPLC-MS/MS method of M6G.....                                                   | S4  |
| ● <b>Table S4.</b> Stability of morphine in rat dialysates.....                                                                   | S5  |
| ● <b>Table S5.</b> Stability of M3G in rat dialysates.....                                                                        | S6  |
| ● <b>Table S6.</b> Stability of M6G in rat dialysates.....                                                                        | S7  |
| ● <b>Table S7.</b> <i>In vitro</i> microdialysis recovery of morphine and M3G in probes.....                                      | S8  |
| ● <b>Figure S1.</b> MRM chromatograms of blank, spiked with compounds, and biological maternal blood and placenta dialysates..... | S9  |
| ● <b>Figure S2.</b> MRM chromatograms of blank, spiked with compounds, and biological fetus and amniotic fluid dialysates.....    | S10 |

Table S1. Intra- and inter-day precision (% RSD) and accuracy (% Bias) of the UHPLC-MS/MS method for the determination of morphine in rat maternal blood, placenta, fetus, and amniotic fluid dialysates.

| Nominal concentration (ng/mL) | Intra-day                      |                   |                   | Inter-day                      |                   |                   |
|-------------------------------|--------------------------------|-------------------|-------------------|--------------------------------|-------------------|-------------------|
|                               | Observed concentration (ng/mL) | Precision (% RSD) | Accuracy (% Bias) | Observed concentration (ng/mL) | Precision (% RSD) | Accuracy (% Bias) |
| <b>Maternal blood</b>         |                                |                   |                   |                                |                   |                   |
| 1                             | 0.89 ± 0.04                    | 4.84              | -11.11            | 1.06 ± 0.17                    | 16.10             | 5.78              |
| 5                             | 4.81 ± 0.08                    | 1.58              | -3.80             | 4.82 ± 0.57                    | 11.78             | -3.67             |
| 100                           | 101.5 ± 0.40                   | 0.40              | 1.57              | 101.5 ± 3.82                   | 3.77              | 1.52              |
| 500                           | 498.6 ± 3.53                   | 0.71              | 0.71              | 499.8 ± 0.56                   | 0.11              | -0.04             |
| <b>Placenta</b>               |                                |                   |                   |                                |                   |                   |
| 1                             | 1.16 ± 0.13                    | 10.90             | 16.45             | 1.03 ± 0.16                    | 15.02             | 3.36              |
| 5                             | 5.10 ± 0.12                    | 2.44              | 2.04              | 4.84 ± 0.30                    | 6.10              | -3.16             |
| 100                           | 94.06 ± 1.08                   | 1.15              | -5.94             | 101.0 ± 3.11                   | 3.08              | 1.03              |
| 500                           | 448.9 ± 31.63                  | 7.05              | -10.21            | 499.9 ± 0.49                   | 0.10              | -0.02             |
| <b>Fetus</b>                  |                                |                   |                   |                                |                   |                   |
| 1                             | 1.20 ± 0.22                    | 18.07             | 19.90             | 0.88 ± 0.08                    | 9.52              | -11.72            |
| 5                             | 4.97 ± 0.16                    | 3.23              | -0.61             | 4.87 ± 0.37                    | 7.50              | -2.62             |
| 100                           | 94.89 ± 1.59                   | 1.67              | -5.11             | 101.5 ± 4.04                   | 3.98              | 1.51              |
| 500                           | 456.5 ± 24.80                  | 5.43              | -8.69             | 499.8 ± 0.48                   | 0.10              | -0.04             |
| <b>Amniotic fluid</b>         |                                |                   |                   |                                |                   |                   |
| 1                             | 0.98 ± 0.18                    | 18.81             | -1.96             | 1.18 ± 0.16                    | 13.36             | 17.53             |
| 5                             | 5.02 ± 0.21                    | 4.20              | 0.36              | 4.93 ± 0.34                    | 6.90              | -1.41             |
| 100                           | 108.7 ± 2.72                   | 2.51              | 8.67              | 104.6 ± 1.99                   | 1.90              | 4.61              |
| 500                           | 502.6 ± 5.61                   | 1.12              | 0.53              | 499.9 ± 0.26                   | 0.05              | -0.03             |

Data are expressed as Mean ± SD (n = 5).

Table S2. Intra- and inter-day precision (% RSD) and accuracy (% Bias) of the UHPLC-MS/MS method for the determination of M3G in rat maternal blood, placenta, fetus, and amniotic fluid dialysates.

| Nominal concentration (ng/mL) | Intra-day                      |                   |                   | Inter-day                      |                   |                   |
|-------------------------------|--------------------------------|-------------------|-------------------|--------------------------------|-------------------|-------------------|
|                               | Observed concentration (ng/mL) | Precision (% RSD) | Accuracy (% Bias) | Observed concentration (ng/mL) | Precision (% RSD) | Accuracy (% Bias) |
| <b>Maternal blood</b>         |                                |                   |                   |                                |                   |                   |
| 1                             | 0.99 ± 0.03                    | 3.26              | -1.25             | 1.13 ± 0.20                    | 17.56             | 13.06             |
| 5                             | 4.96 ± 0.03                    | 0.51              | -0.71             | 5.14 ± 0.38                    | 7.48              | 2.80              |
| 100                           | 101.9 ± 2.21                   | 2.17              | 1.94              | 99.17 ± 3.18                   | 3.21              | -0.83             |
| 500                           | 498.2 ± 23.58                  | 4.73              | -0.35             | 500.2 ± 0.46                   | 0.09              | 0.03              |
| <b>Placenta</b>               |                                |                   |                   |                                |                   |                   |
| 1                             | 0.97 ± 0.10                    | 9.90              | -2.93             | 0.99 ± 0.20                    | 19.85             | -1.03             |
| 5                             | 5.26 ± 0.16                    | 3.09              | 5.31              | 4.90 ± 0.31                    | 6.41              | -2.08             |
| 100                           | 100.3 ± 0.29                   | 0.29              | 0.39              | 99.30 ± 3.37                   | 3.39              | -0.70             |
| 500                           | 517.5 ± 10.27                  | 1.99              | -3.49             | 500.2 ± 0.50                   | 0.10              | 0.04              |
| <b>Fetus</b>                  |                                |                   |                   |                                |                   |                   |
| 1                             | 1.05 ± 0.07                    | 6.72              | 4.87              | 1.02 ± 0.19                    | 18.76             | 2.00              |
| 5                             | 5.73 ± 0.12                    | 2.18              | 14.60             | 5.07 ± 0.37                    | 7.23              | 1.49              |
| 100                           | 98.05 ± 2.58                   | 2.64              | -1.95             | 99.06 ± 4.32                   | 4.36              | -0.94             |
| 500                           | 481.6 ± 11.03                  | 2.29              | -3.68             | 500.0 ± 0.25                   | 0.05              | -0.01             |
| <b>Amniotic fluid</b>         |                                |                   |                   |                                |                   |                   |
| 1                             | 1.19 ± 0.04                    | 3.22              | 18.84             | 1.19 ± 0.22                    | 18.34             | 18.78             |
| 5                             | 5.29 ± 0.18                    | 3.32              | 5.73              | 5.12 ± 0.24                    | 4.63              | 2.34              |
| 100                           | 98.04 ± 14.11                  | 14.39             | -1.96             | 98.89 ± 3.09                   | 3.13              | -1.11             |
| 500                           | 478.2 ± 13.49                  | 2.82              | -4.36             | 500.3 ± 0.42                   | 0.08              | 0.06              |

Data are expressed as Mean ± SD (n = 5).

Table S3. Intra- and inter-day precision (% RSD) and accuracy (% Bias) of the UHPLC-MS/MS method for the determination of M6G in rat maternal blood, placenta, fetus, and amniotic fluid dialysates.

| Nominal concentration (ng/mL) | Intra-day                      |                   |                   | Inter-day                      |                   |                   |
|-------------------------------|--------------------------------|-------------------|-------------------|--------------------------------|-------------------|-------------------|
|                               | Observed concentration (ng/mL) | Precision (% RSD) | Accuracy (% Bias) | Observed concentration (ng/mL) | Precision (% RSD) | Accuracy (% Bias) |
| <b>Maternal blood</b>         |                                |                   |                   |                                |                   |                   |
| 5                             | 4.82 ± 0.25                    | 5.26              | -3.60             | 5.17 ± 0.39                    | 7.50              | 3.36              |
| 10                            | 9.80 ± 0.25                    | 2.58              | -1.91             | 9.95 ± 1.21                    | 12.20             | -0.48             |
| 500                           | 499.1 ± 3.66                   | 0.73              | -0.17             | 508.5 ± 28.57                  | 5.62              | 1.69              |
| 1000                          | 1000 ± 14.83                   | 1.48              | 0.03              | 1000 ± 3.17                    | 0.32              | 0.03              |
| <b>Placenta</b>               |                                |                   |                   |                                |                   |                   |
| 5                             | 4.97 ± 0.24                    | 4.74              | -0.51             | 5.92 ± 1.12                    | 18.92             | 18.37             |
| 10                            | 10.00 ± 0.27                   | 2.72              | 0.02              | 11.06 ± 1.20                   | 10.88             | 10.65             |
| 500                           | 489.3 ± 9.45                   | 1.93              | -2.14             | 500.8 ± 4.07                   | 0.81              | 0.15              |
| 1000                          | 986.9 ± 26.73                  | 2.71              | -1.31             | 1000 ± 2.00                    | 0.20              | -0.02             |
| <b>Fetus</b>                  |                                |                   |                   |                                |                   |                   |
| 5                             | 4.86 ± 0.22                    | 4.62              | -2.91             | 5.31 ± 0.83                    | 15.67             | 6.28              |
| 10                            | 9.69 ± 0.17                    | 1.80              | -3.06             | 11.07 ± 1.12                   | 10.09             | 10.71             |
| 500                           | 485.9 ± 8.15                   | 1.68              | -2.81             | 495.2 ± 7.18                   | 1.45              | -0.96             |
| 1000                          | 999.2 ± 6.33                   | 0.63              | -0.08             | 1002 ± 3.40                    | 0.34              | 0.23              |
| <b>Amniotic fluid</b>         |                                |                   |                   |                                |                   |                   |
| 5                             | 5.29 ± 0.22                    | 4.15              | 5.81              | 4.90 ± 0.70                    | 14.20             | -2.03             |
| 10                            | 9.96 ± 0.24                    | 2.46              | -0.36             | 10.23 ± 0.69                   | 6.79              | 2.29              |
| 500                           | 436.3 ± 36.03                  | 8.26              | -12.75            | 503.7 ± 8.44                   | 1.68              | 0.75              |
| 1000                          | 923.5 ± 44.05                  | 4.77              | -7.65             | 998.2 ± 3.72                   | 0.37              | -0.17             |

Data are expressed as Mean ± SD (n = 5).

Table S4. Stability of morphine in rat maternal blood, placenta, fetus, and amniotic fluid dialysates.

| Nominal concentration (ng/mL) | Autosampler stability (%) | Short-term stability (%) | Freeze-thaw stability (%) | Long-term stability (%) |
|-------------------------------|---------------------------|--------------------------|---------------------------|-------------------------|
| <b>Maternal blood</b>         |                           |                          |                           |                         |
| 5                             | 98.81 ± 2.21              | 89.44 ± 2.95             | 99.60 ± 3.10              | 92.87 ± 0.22            |
| 500                           | 96.70 ± 0.56              | 92.84 ± 1.26             | 102.3 ± 0.41              | 87.32 ± 1.02            |
| <b>Placenta</b>               |                           |                          |                           |                         |
| 5                             | 98.90 ± 1.13              | 91.93 ± 1.35             | 99.52 ± 2.18              | 91.00 ± 3.19            |
| 500                           | 101.6 ± 0.37              | 91.78 ± 0.67             | 100.9 ± 1.62              | 91.35 ± 3.22            |
| <b>Fetus</b>                  |                           |                          |                           |                         |
| 5                             | 98.00 ± 1.06              | 90.68 ± 3.98             | 100.2 ± 1.77              | 93.24 ± 3.44            |
| 500                           | 98.09 ± 1.25              | 87.97 ± 0.41             | 100.4 ± 0.85              | 89.84 ± 1.13            |
| <b>Amniotic fluid</b>         |                           |                          |                           |                         |
| 5                             | 99.30 ± 2.08              | 88.82 ± 2.22             | 97.97 ± 0.79              | 94.60 ± 0.64            |
| 500                           | 97.16 ± 0.54              | 88.45 ± 0.57             | 98.17 ± 0.98              | 90.56 ± 1.48            |

Data are expressed as Mean ± SD (n = 3).

Table S5. Stability of M3G in rat maternal blood, placenta, fetus, and amniotic fluid dialysates.

| Nominal concentration (ng/mL) | Autosampler stability (%) | Short-term stability (%) | Freeze-thaw stability (%) | Long-term stability (%) |
|-------------------------------|---------------------------|--------------------------|---------------------------|-------------------------|
| <b>Maternal blood</b>         |                           |                          |                           |                         |
| 5                             | 104.2 ± 1.69              | 100.5 ± 2.14             | 100.3 ± 3.62              | 101.0 ± 4.41            |
| 500                           | 104.2 ± 1.24              | 100.2 ± 0.78             | 105.1 ± 1.45              | 105.8 ± 0.74            |
| <b>Placenta</b>               |                           |                          |                           |                         |
| 5                             | 100.2 ± 1.75              | 98.00 ± 4.45             | 103.7 ± 0.73              | 98.34 ± 1.34            |
| 500                           | 100.4 ± 0.60              | 101.0 ± 1.92             | 101.5 ± 0.95              | 97.25 ± 9.67            |
| <b>Fetus</b>                  |                           |                          |                           |                         |
| 5                             | 99.90 ± 1.87              | 99.29 ± 3.05             | 102.6 ± 1.10              | 101.3 ± 0.94            |
| 500                           | 98.50 ± 0.43              | 98.03 ± 1.16             | 103.6 ± 0.46              | 102.4 ± 0.40            |
| <b>Amniotic fluid</b>         |                           |                          |                           |                         |
| 5                             | 99.86 ± 0.86              | 99.28 ± 4.40             | 100.4 ± 1.39              | 102.6 ± 2.87            |
| 500                           | 98.14 ± 0.48              | 101.3 ± 1.35             | 99.30 ± 0.55              | 101.0 ± 6.99            |

Data are expressed as Mean ± SD (n = 3).

Table S6. Stability of M6G in rat maternal blood, placenta, fetus, and amniotic fluid dialysates.

| Nominal concentration (ng/mL) | Autosampler stability (%) | Short-term stability (%) | Freeze-thaw stability (%) | Long-term stability (%) |
|-------------------------------|---------------------------|--------------------------|---------------------------|-------------------------|
| <b>Maternal blood</b>         |                           |                          |                           |                         |
| 10                            | 98.93 ± 0.98              | 92.59 ± 1.79             | 99.13 ± 2.76              | 92.54 ± 1.63            |
| 1000                          | 98.23 ± 0.76              | 93.12 ± 5.87             | 101.0 ± 0.82              | 94.73 ± 1.36            |
| <b>Placenta</b>               |                           |                          |                           |                         |
| 10                            | 100.0 ± 1.81              | 90.78 ± 0.90             | 101.1 ± 1.94              | 91.77 ± 3.05            |
| 1000                          | 100.3 ± 1.01              | 91.34 ± 1.18             | 99.59 ± 1.63              | 92.48 ± 7.41            |
| <b>Fetus</b>                  |                           |                          |                           |                         |
| 10                            | 99.07 ± 1.04              | 93.90 ± 3.16             | 101.8 ± 0.86              | 93.68 ± 0.59            |
| 1000                          | 99.89 ± 0.12              | 90.91 ± 1.31             | 99.82 ± 1.60              | 96.36 ± 0.44            |
| <b>Amniotic fluid</b>         |                           |                          |                           |                         |
| 10                            | 99.35 ± 0.56              | 91.50 ± 2.67             | 101.0 ± 2.23              | 92.88 ± 1.56            |
| 1000                          | 99.55 ± 0.99              | 89.51 ± 2.18             | 97.61 ± 0.35              | 93.82 ± 4.56            |

Data are expressed as Mean ± SD (n = 3).

Table S7. *In vitro* microdialysis recovery (%) of morphine and M3G in blood and placenta probe using ACD solution as perfusion solution.

| Concentration<br>(ng/mL) | Recovery (%) in<br>blood probe | Recovery (%) in<br>placenta probe |
|--------------------------|--------------------------------|-----------------------------------|
| <b>Morphine</b>          |                                |                                   |
| 100                      | 25.86 ± 2.83                   | 13.91 ± 0.91                      |
| 500                      | 24.90 ± 1.95                   | 14.15 ± 0.88                      |
| 1000                     | 25.33 ± 0.73                   | 14.87 ± 1.36                      |
| average                  | 25.36 ± 0.48                   | 14.31 ± 0.50                      |
| <b>M3G</b>               |                                |                                   |
| 100                      | 7.09 ± 0.39                    | 3.92 ± 0.20                       |
| 500                      | 7.44 ± 0.39                    | 4.26 ± 0.49                       |
| 1000                     | 6.96 ± 0.60                    | 4.04 ± 0.22                       |
| average                  | 7.16 ± 0.25                    | 4.07 ± 0.17                       |

Data are expressed as Mean ± SD (n = 3).



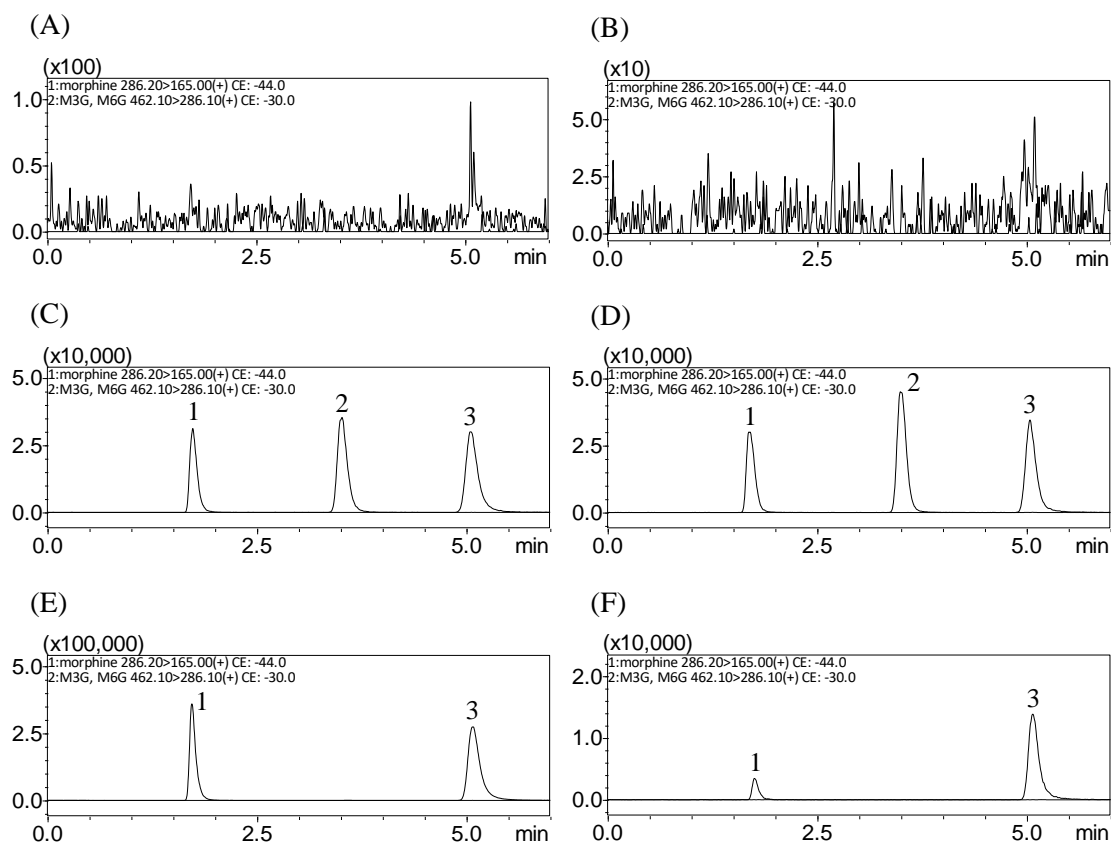

Figure S1. Representative MRM chromatograms of (A) blank maternal blood dialysate, (B) blank placenta dialysate, (C) blank maternal blood dialysate spiked with M3G (100 ng/mL), morphine (100 ng/mL), and M6G (500 ng/mL), (D) blank placenta dialysate spiked with M3G (100 ng/mL), morphine (100 ng/mL), and M6G (500 ng/mL), (E) maternal blood dialysate sample containing M3G (978.01 ng/mL) and morphine (938.61 ng/mL) collected at 40 min after morphine administration (10 mg/kg, i.v.), (F) placenta dialysate sample containing M3G (12.58 ng/mL) and morphine (42.14 ng/mL) collected at 100 min after morphine administration (10 mg/kg, i.v.); peak 1 = M3G, peak 2 = M6G, peak 3 = morphine.

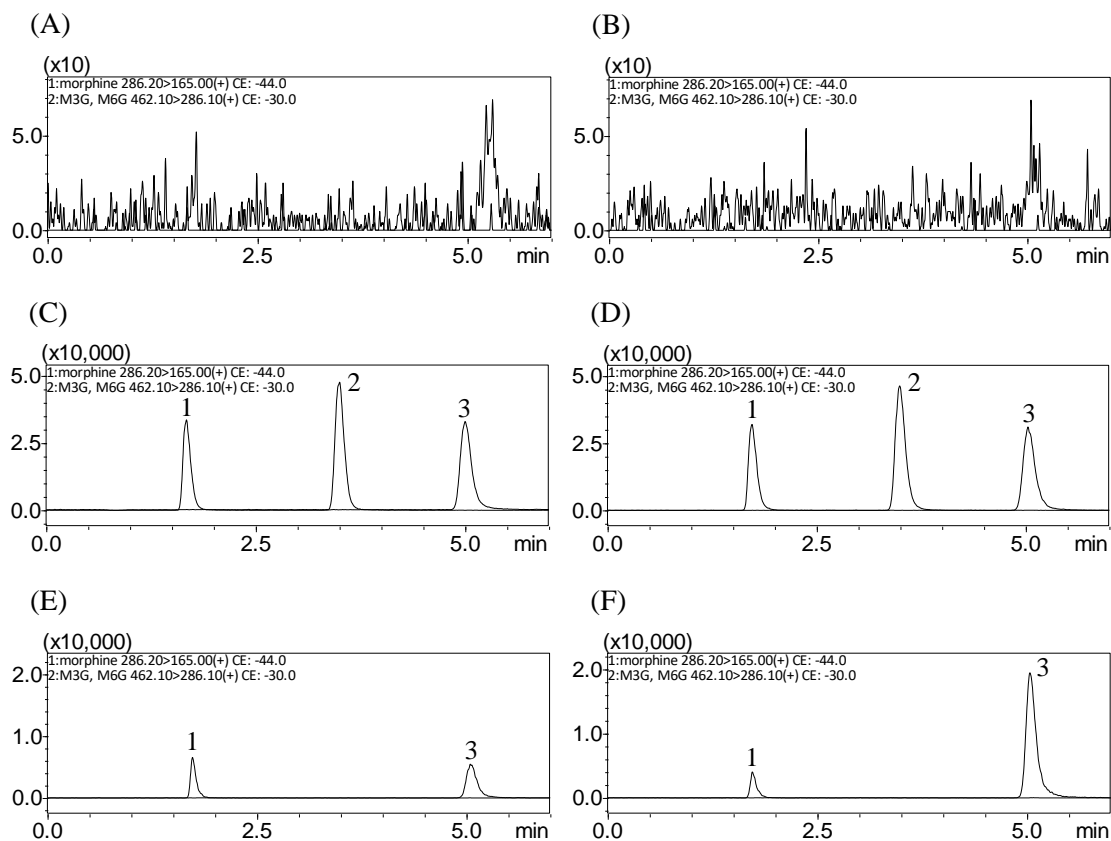

Figure S2. Representative MRM chromatograms of (A) blank fetus dialysate, (B) blank amniotic fluid dialysate, (C) blank fetus dialysate spiked with M3G (100 ng/mL), morphine (100 ng/mL), and M6G (500 ng/mL), (D) blank amniotic fluid dialysate spiked with M3G (100 ng/mL), morphine (100 ng/mL), and M6G (500 ng/mL), (E) fetus dialysate sample containing M3G (18.87 ng/mL) and morphine (16.85 ng/mL) collected at 100 min after morphine administration (10 mg/kg, i.v.), (F) amniotic fluid dialysate sample containing M3G (13.95 ng/mL) and morphine (57.67 ng/mL) collected at 100 min after morphine administration (10 mg/kg, i.v.); peak 1 = M3G, peak 2 = M6G, peak 3 = morphine.
